# Supplementary material for: Molecular dynamics simulations of the aqueous interface with the [BMI][PF6] ionic liquid: comparison of different solvent models
Source: Royal Society of Chemistry journal article supplement (doi:10.1039/b608218a), 2006-01-01

Molecular dynamics simulations of the aqueous interface with the [BMI][PF<sub>6</sub>] ionic liquid:  
 comparison of different solvent models

G. Chevrot, R. Schurhammer and G. Wipff

Electronic Supplementary Information: Table S1 and Fig. S1–S10.

| <i>IL</i><br><i>Water</i>    | IL <sup>±1</sup><br>SPC/E<br>PI | IL <sup>±1</sup><br>TIP5P<br>PI | IL <sup>±0.9</sup><br>TIP3P<br>PI | IL <sup>±0.9</sup><br>SPC/E<br>PI | IL <sup>±0.9</sup><br>TIP5P<br>PI | IL <sup>±0.9</sup><br>TIP3P<br>DE | IL <sup>±0.9</sup><br>SPC/E<br>DE | IL <sup>±0.9</sup><br>TIP5P<br>DE |
|------------------------------|---------------------------------|---------------------------------|-----------------------------------|-----------------------------------|-----------------------------------|-----------------------------------|-----------------------------------|-----------------------------------|
| <b><i>In water</i></b>       |                                 |                                 |                                   |                                   |                                   |                                   |                                   |                                   |
| H <sub>2</sub> O             | 1356 (70)                       | 2162 (39)                       | 3417 (4)                          | 1671 (37)                         | 2077 (43)                         | 3075 (4)                          | 1744 (57)                         | 2019 (36)                         |
| BMI <sup>+</sup>             | 735 (12)                        | (0)                             | 206 (4)                           | 915 (2)                           | (0)                               | 2093 (5)                          | 1724 (2)                          | (0)                               |
| PF <sub>6</sub> <sup>-</sup> | 1063 (10)                       | 657 (3)                         | 454 (4)                           | 631 (2)                           | (0)                               | 1307 (3)                          | 2159 (1)                          | 654 (1)                           |
| <b><i>Interface</i></b>      |                                 |                                 |                                   |                                   |                                   |                                   |                                   |                                   |
| H <sub>2</sub> O             | 859 (48)                        | 1669 (43)                       | 1513 (16)                         | 1211 (65)                         | (0)                               | 976 (30)                          | 1006 (69)                         | (0)                               |
| BMI <sup>+</sup>             | 420 (12)                        | 206 (15)                        | 165 (9)                           | 270 (12)                          | 337 (13)                          | 411 (7)                           | 288 (12)                          | 491 (8)                           |
| PF <sub>6</sub> <sup>-</sup> | 737 (3)                         | 163 (11)                        | 216 (6)                           | 117 (11)                          | 226 (12)                          | 384(12)                           | 354 (11)                          | 436 (11)                          |
| <b><i>In IL</i></b>          |                                 |                                 |                                   |                                   |                                   |                                   |                                   |                                   |
| H <sub>2</sub> O             | 155 (32)                        | 389 (13)                        | 336 (22)                          | 81 (10)                           | 764 (14)                          | 907 (27)                          | 91 (11)                           | 388 (24)                          |
| BMI <sup>+</sup>             | 99 (17)                         | 65 (33)                         | 79 (18)                           | 75 (30)                           | 126 (37)                          | 136 (20)                          | 77 (31)                           | 78 (30)                           |
| PF <sub>6</sub> <sup>-</sup> | 73 (18)                         | 68 (29)                         | 60 (19)                           | 46 (26)                           | 105 (29)                          | 134 (23)                          | 68 (32)                           | 65 (26)                           |

**Table S1:** The [BMI][PF<sub>6</sub>] / water interface calculated with different models: average diffusion coefficients  $\langle D \rangle$  (in  $10^{-8}$  cm<sup>2</sup>/s) for H<sub>2</sub>O, PF<sub>6</sub><sup>-</sup> and BMI<sup>+</sup> species during 0.5 ns for H<sub>2</sub>O in water and during 0.1 ns for the others. The averages have been calculated for all molecules that reside during that time within a slice of 10 Å width centered on bulk IL or at the interface, and a slice of 20 Å width centered on the bulk water. Their number is given in parentheses.

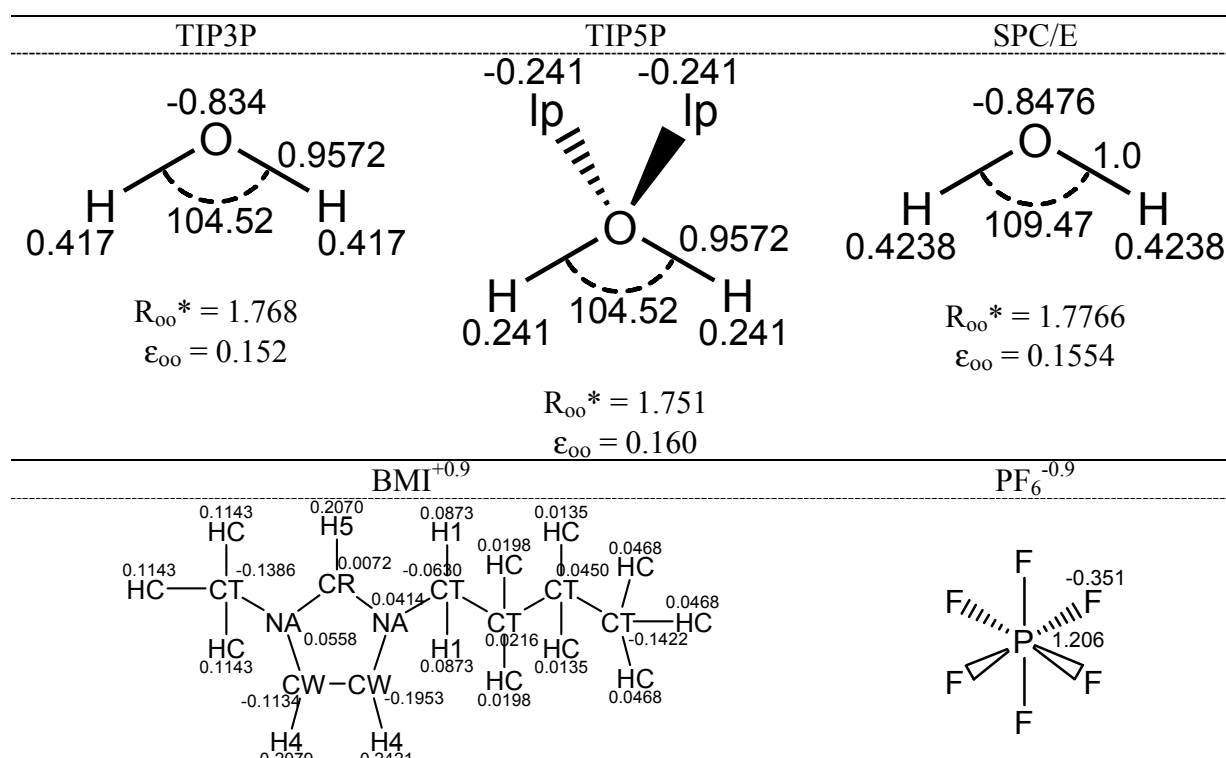

**Figure S1** : Water models (distances in Å, angles in degrees,  $R_{oo}^*$  in Å and  $\epsilon_{oo}$  in kcal/mol).  $BMI^{+0.9}$  and  $PF_6^{-0.9}$  models (atomic charges and atomic atom types).

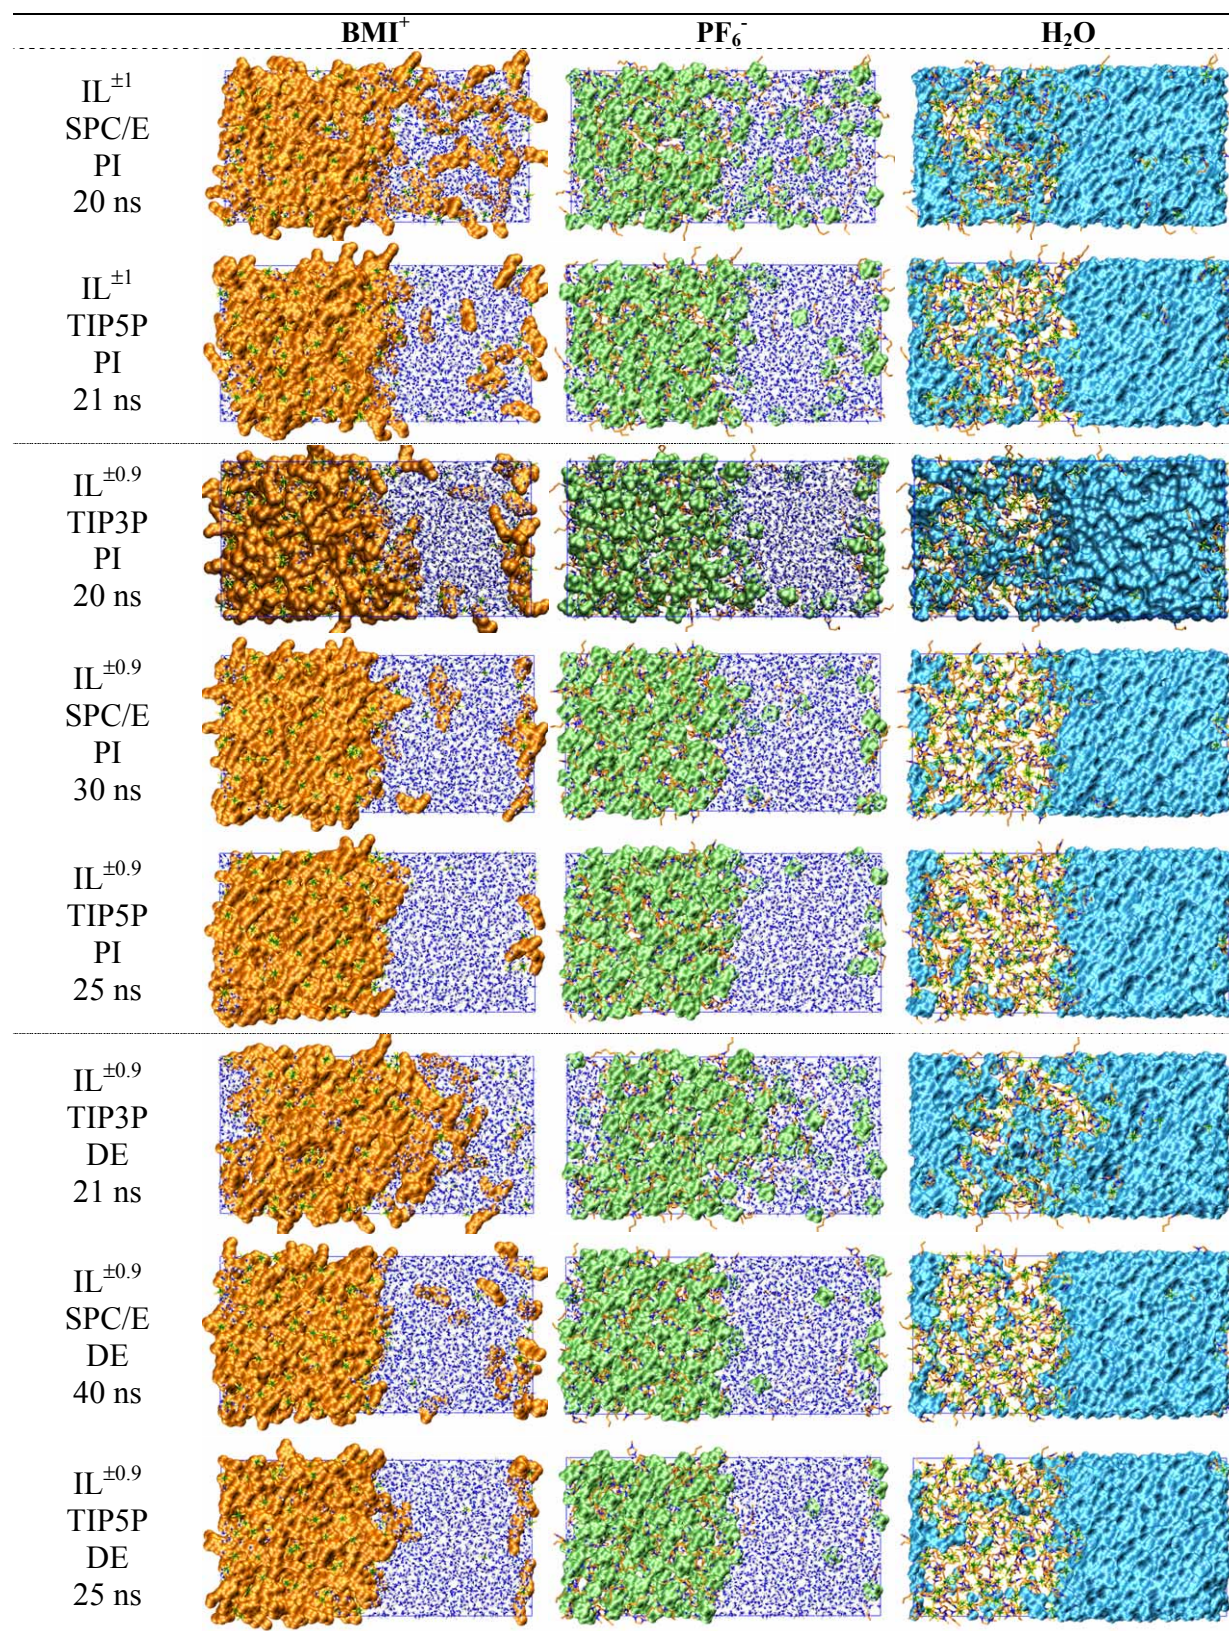

**Figure S2:** [BMI][PF<sub>6</sub>] – water system simulated with different IL and water models. "PI" simulations at the preformed interface and demixing "DE" simulations of randomly mixed liquids: Snapshots at the end of the dynamics, showing separately, from left to right: the BMI<sup>+</sup> cations (orange), the PF<sub>6</sub><sup>-</sup> anions (green) and water (blue).



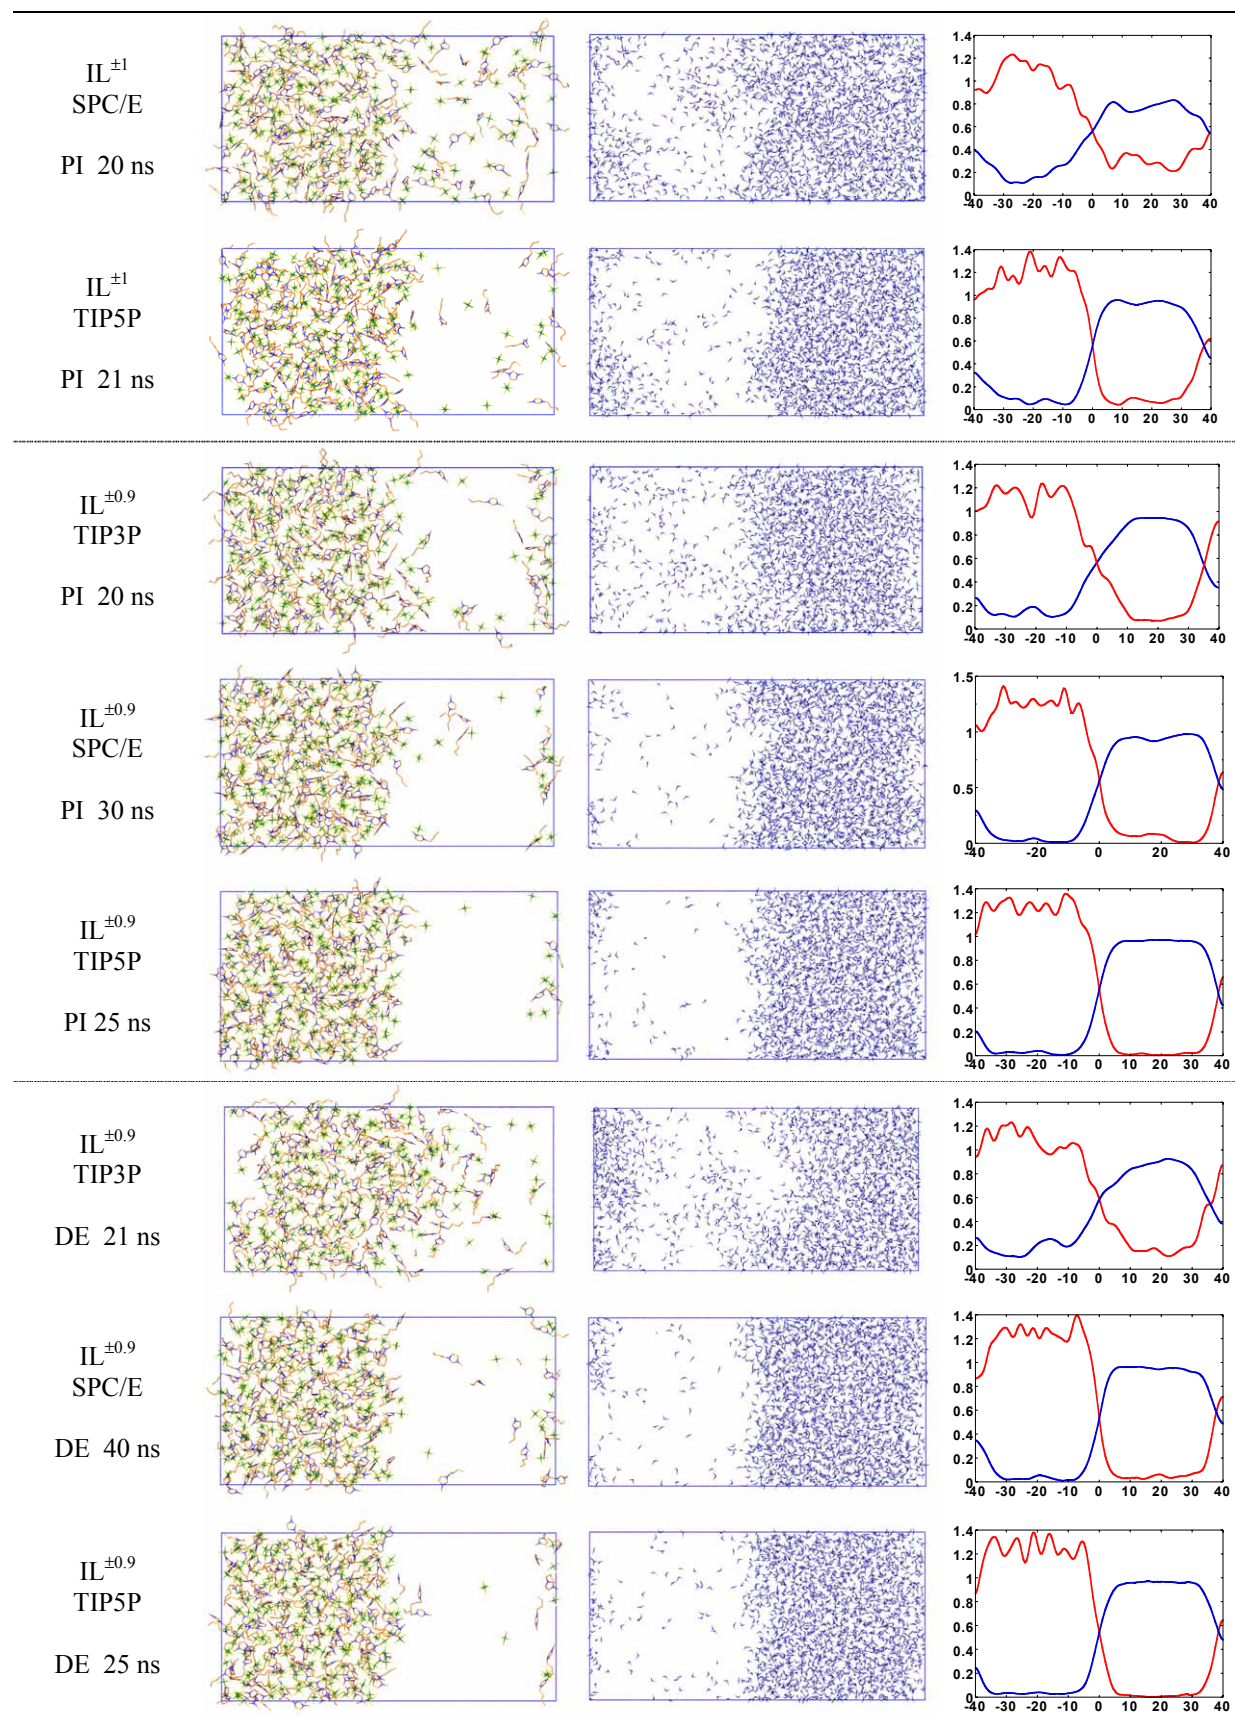

**Figure S3:** [BMI][PF<sub>6</sub>] – water system simulated with different IL and water models. "PI" simulations at the preformed interface and demixing "DE" simulations of randomly mixed liquids: Final snapshots and density curves.



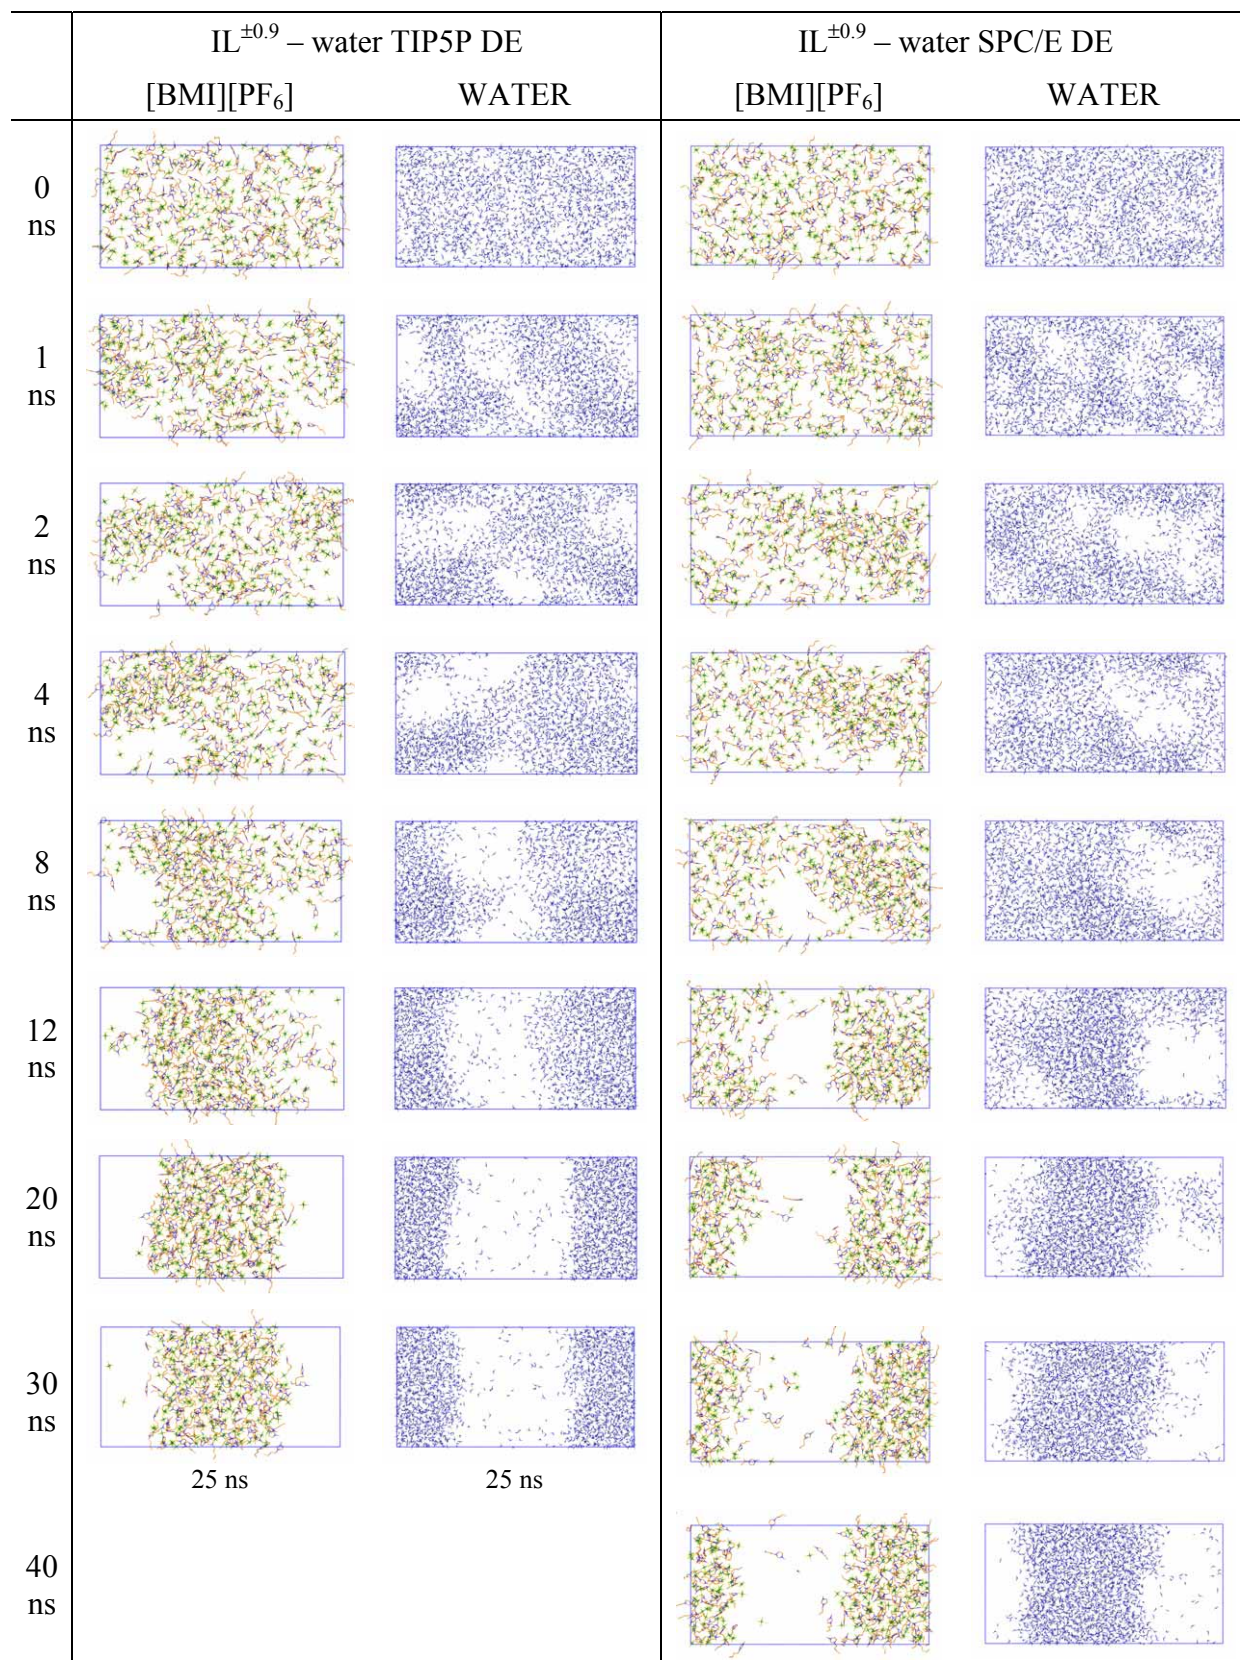

**Figure S4:** Phase separation of the randomly mixed IL – water liquids: IL<sup>±0.9</sup> TIP5P and IL<sup>±0.9</sup> SPC/E models.

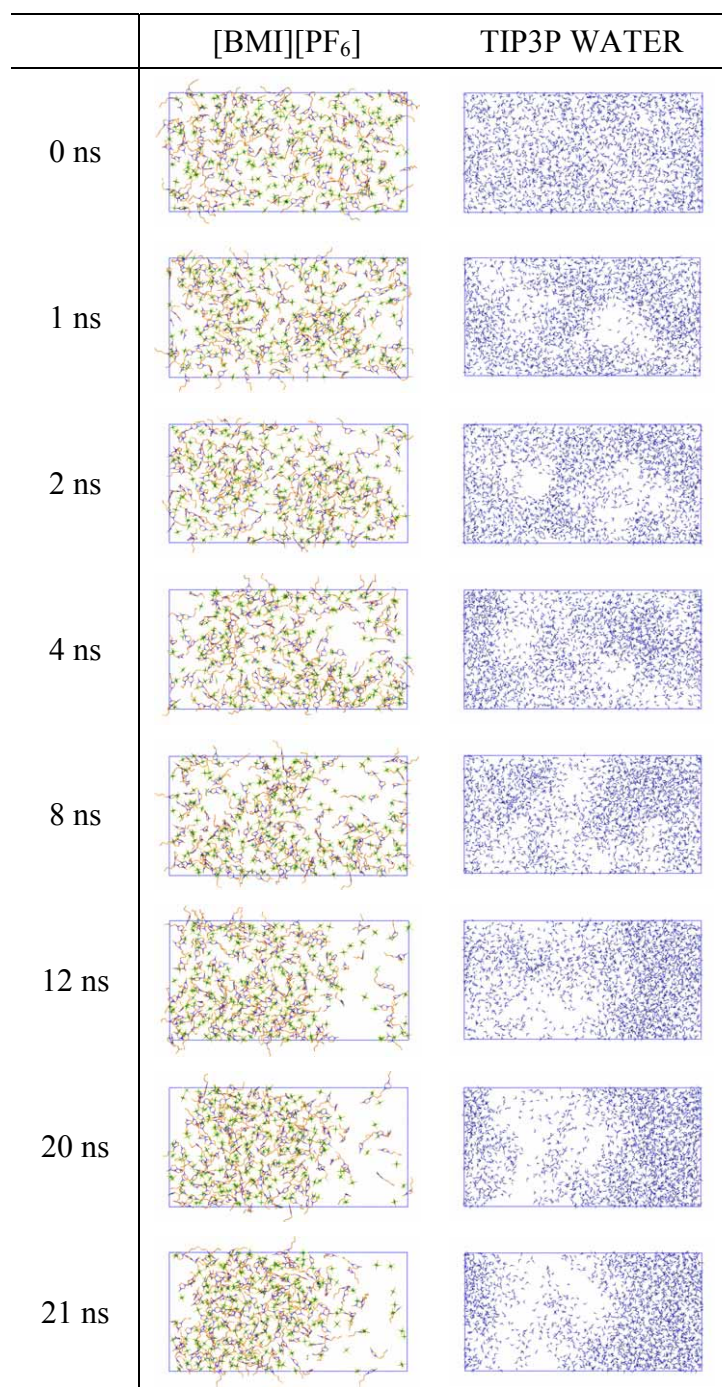

**Figure S5:** Phase separation of the randomly mixed IL<sup>±0.9</sup> – water TIP3P liquids.

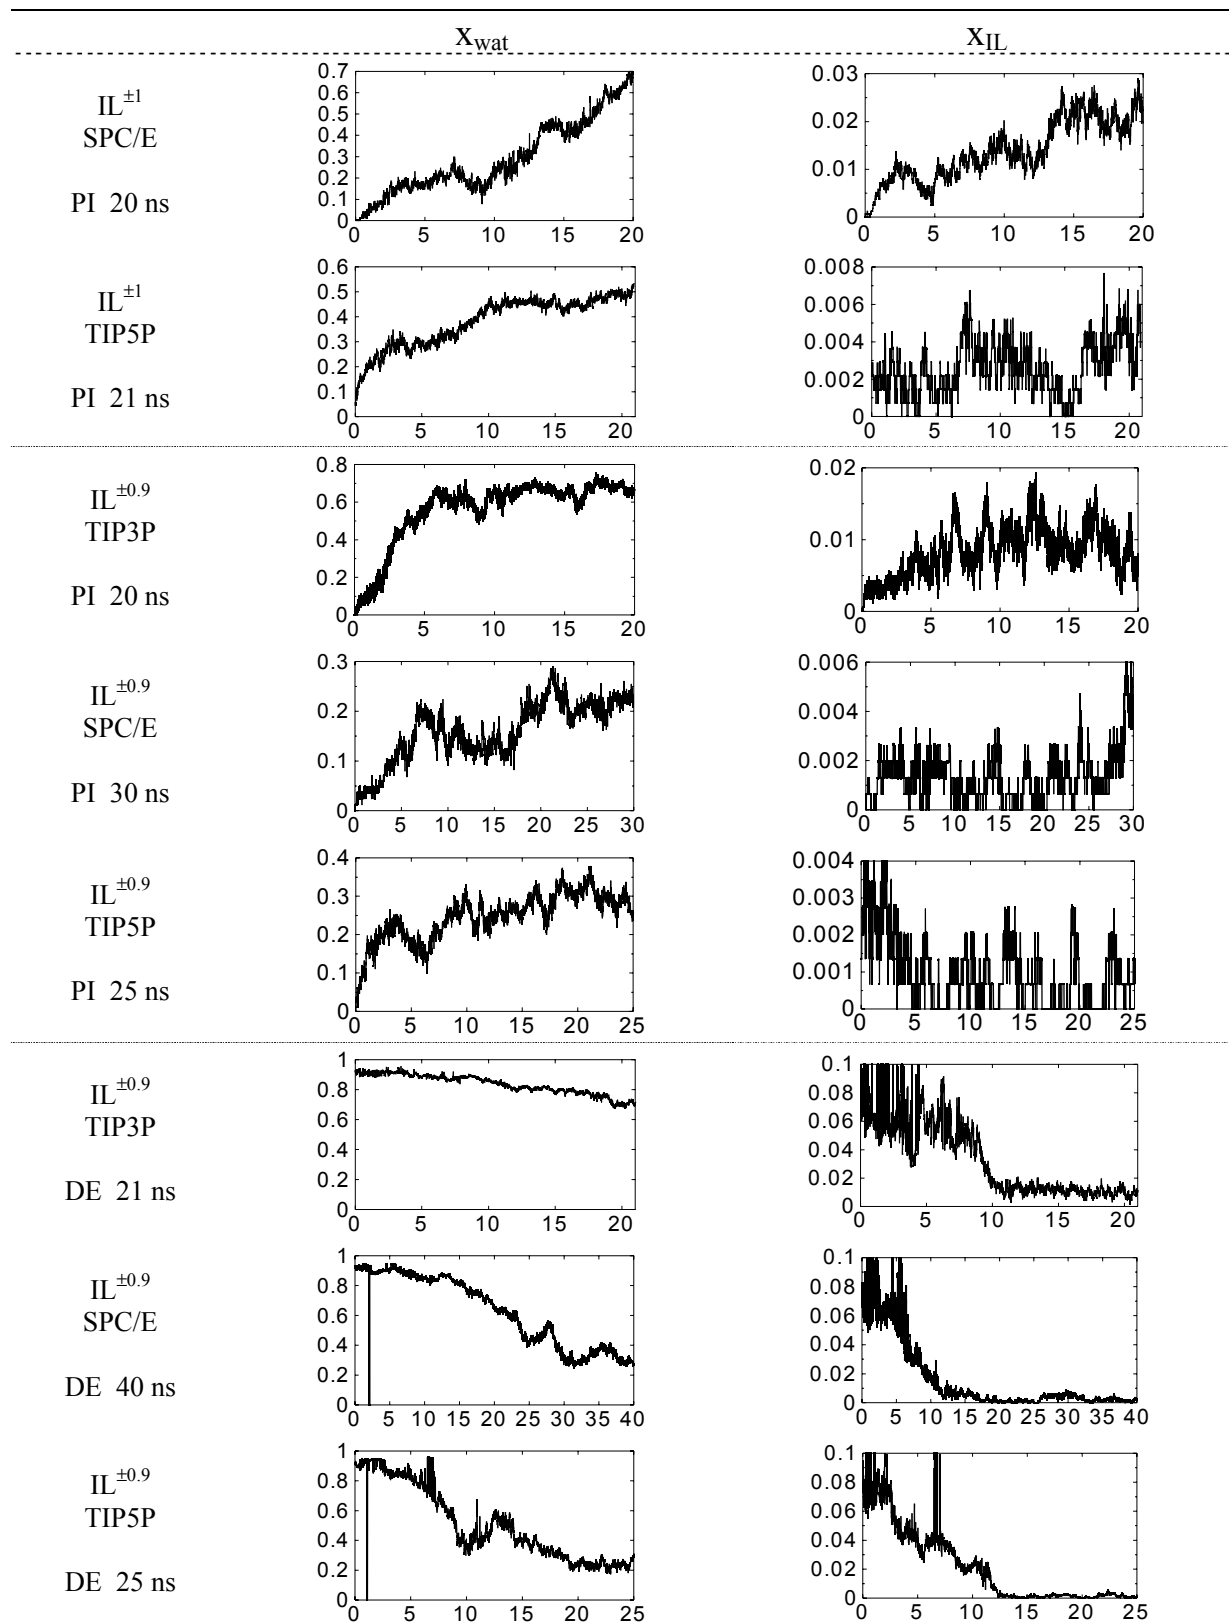

**Figure S6:** Molar fraction of water in IL ( $x_{\text{wat}}$ ) and molar fraction of IL in water ( $x_{\text{IL}}$ ) as a function of time (ns).



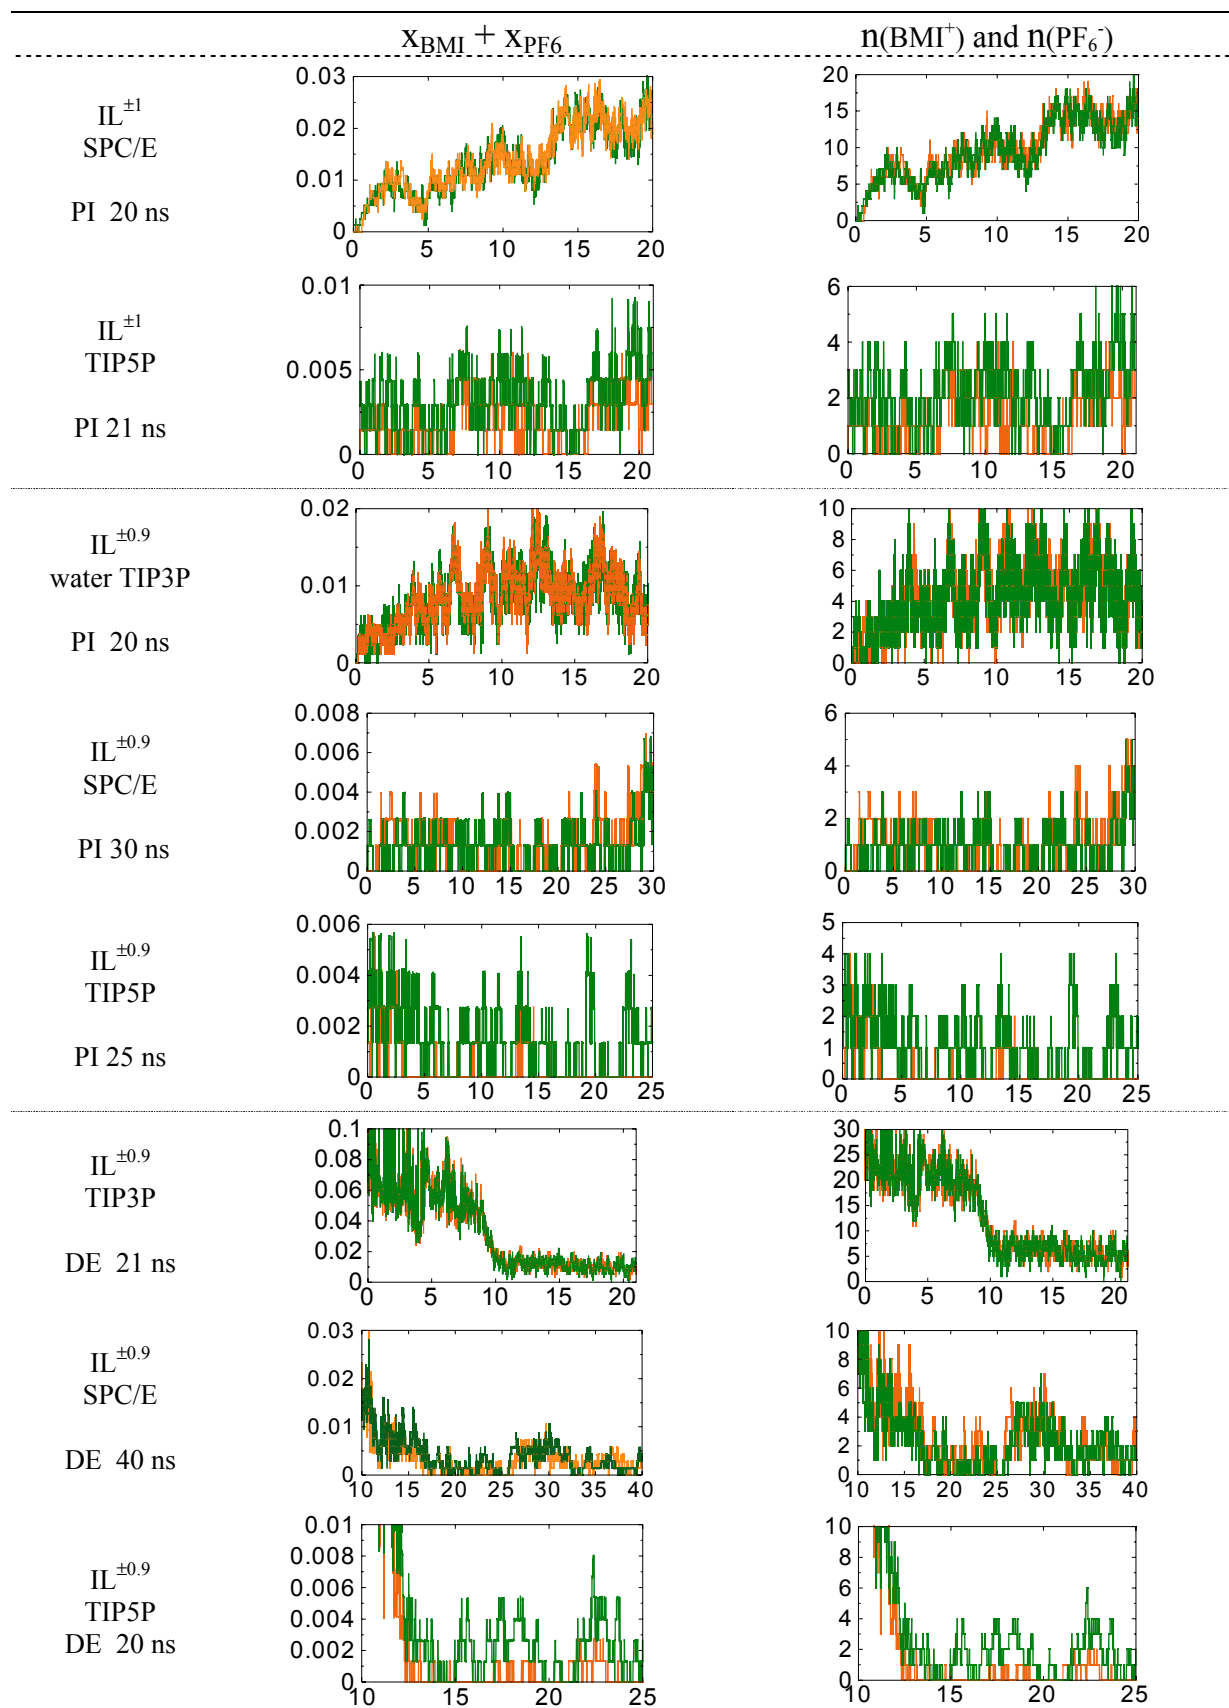

**Figure S7:** Molar fraction (left) and number of BMI<sup>+</sup> and PF<sub>6</sub><sup>-</sup> in water (right) as a function of time (ns) (BMI<sup>+</sup> in orange and PF<sub>6</sub><sup>-</sup> in green).



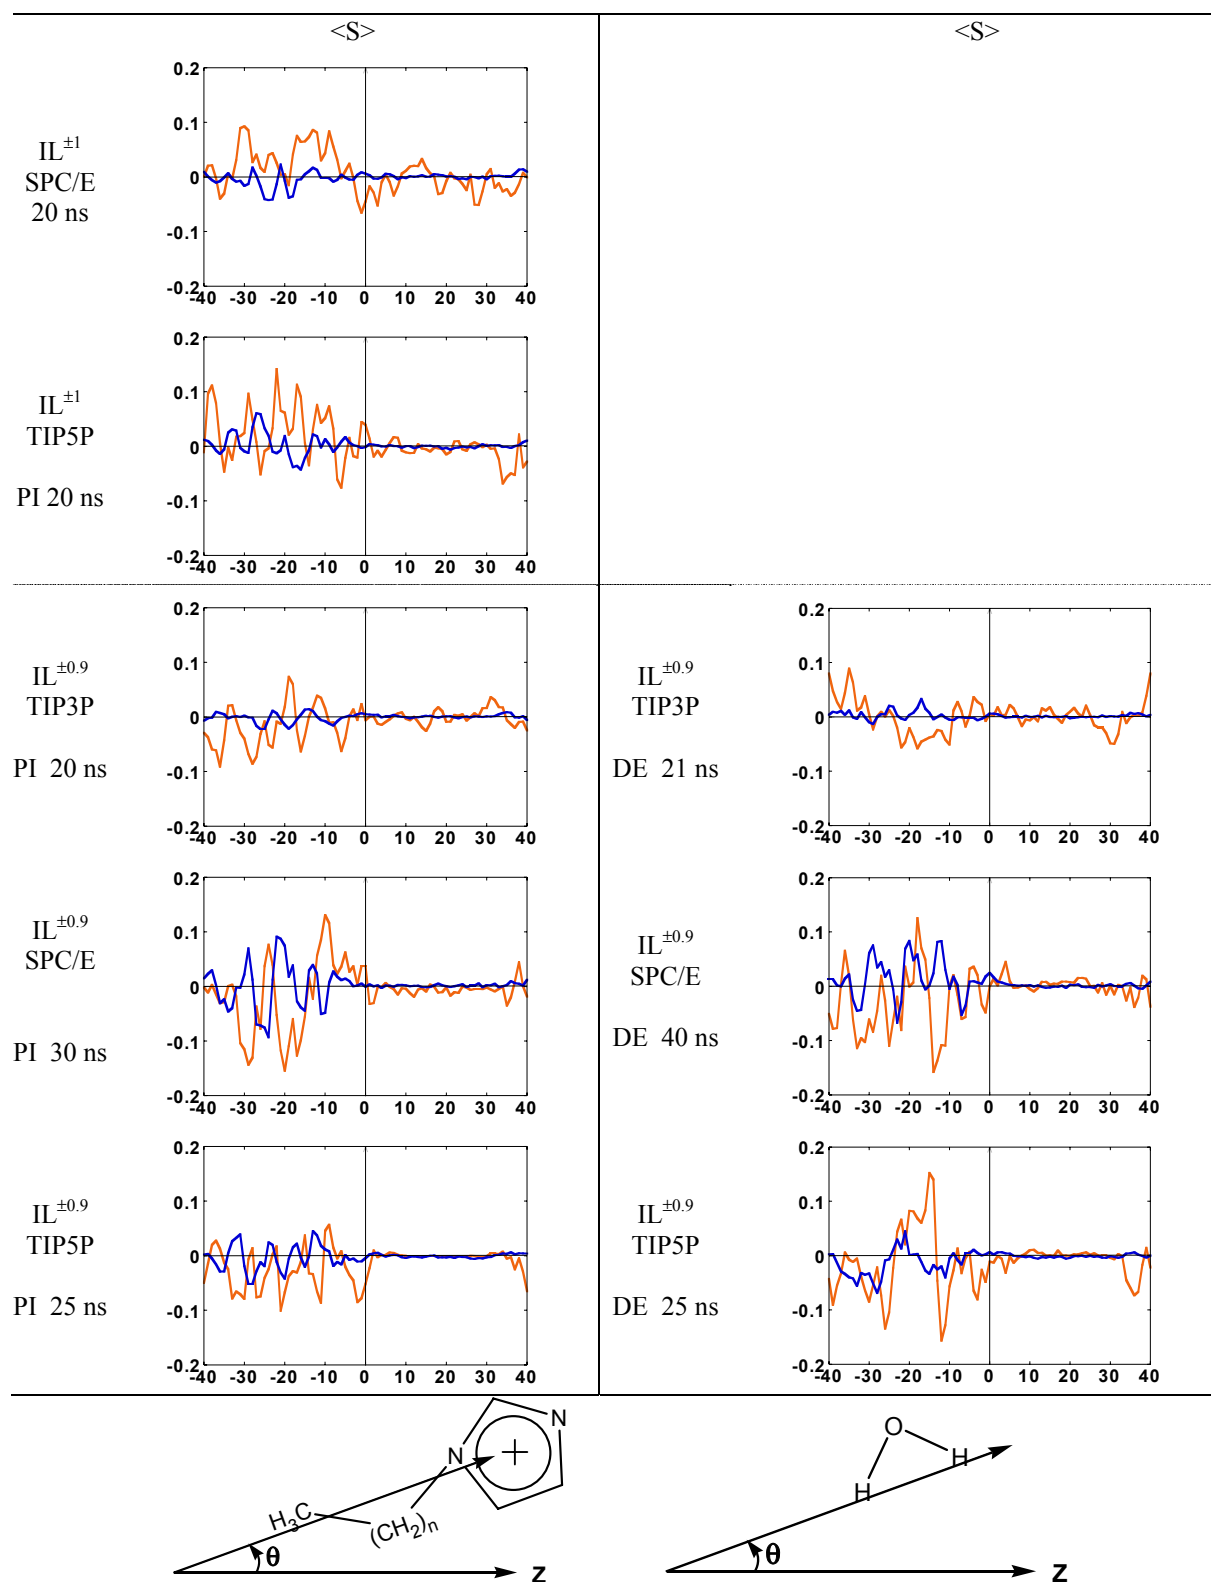

**Figure S8:** Order parameter  $S$  of imidazolium cations (orange curves) and water molecules (blue curves), as a function of their  $z$ -position (averages over the last 3 ns). Angle  $\theta$  between the  $z$ -axis and the  $N_2-CH_3$  vector of the alkyl chain of  $BMI^+$ , or the  $H-H$  vector of the  $H_2O$  molecules.

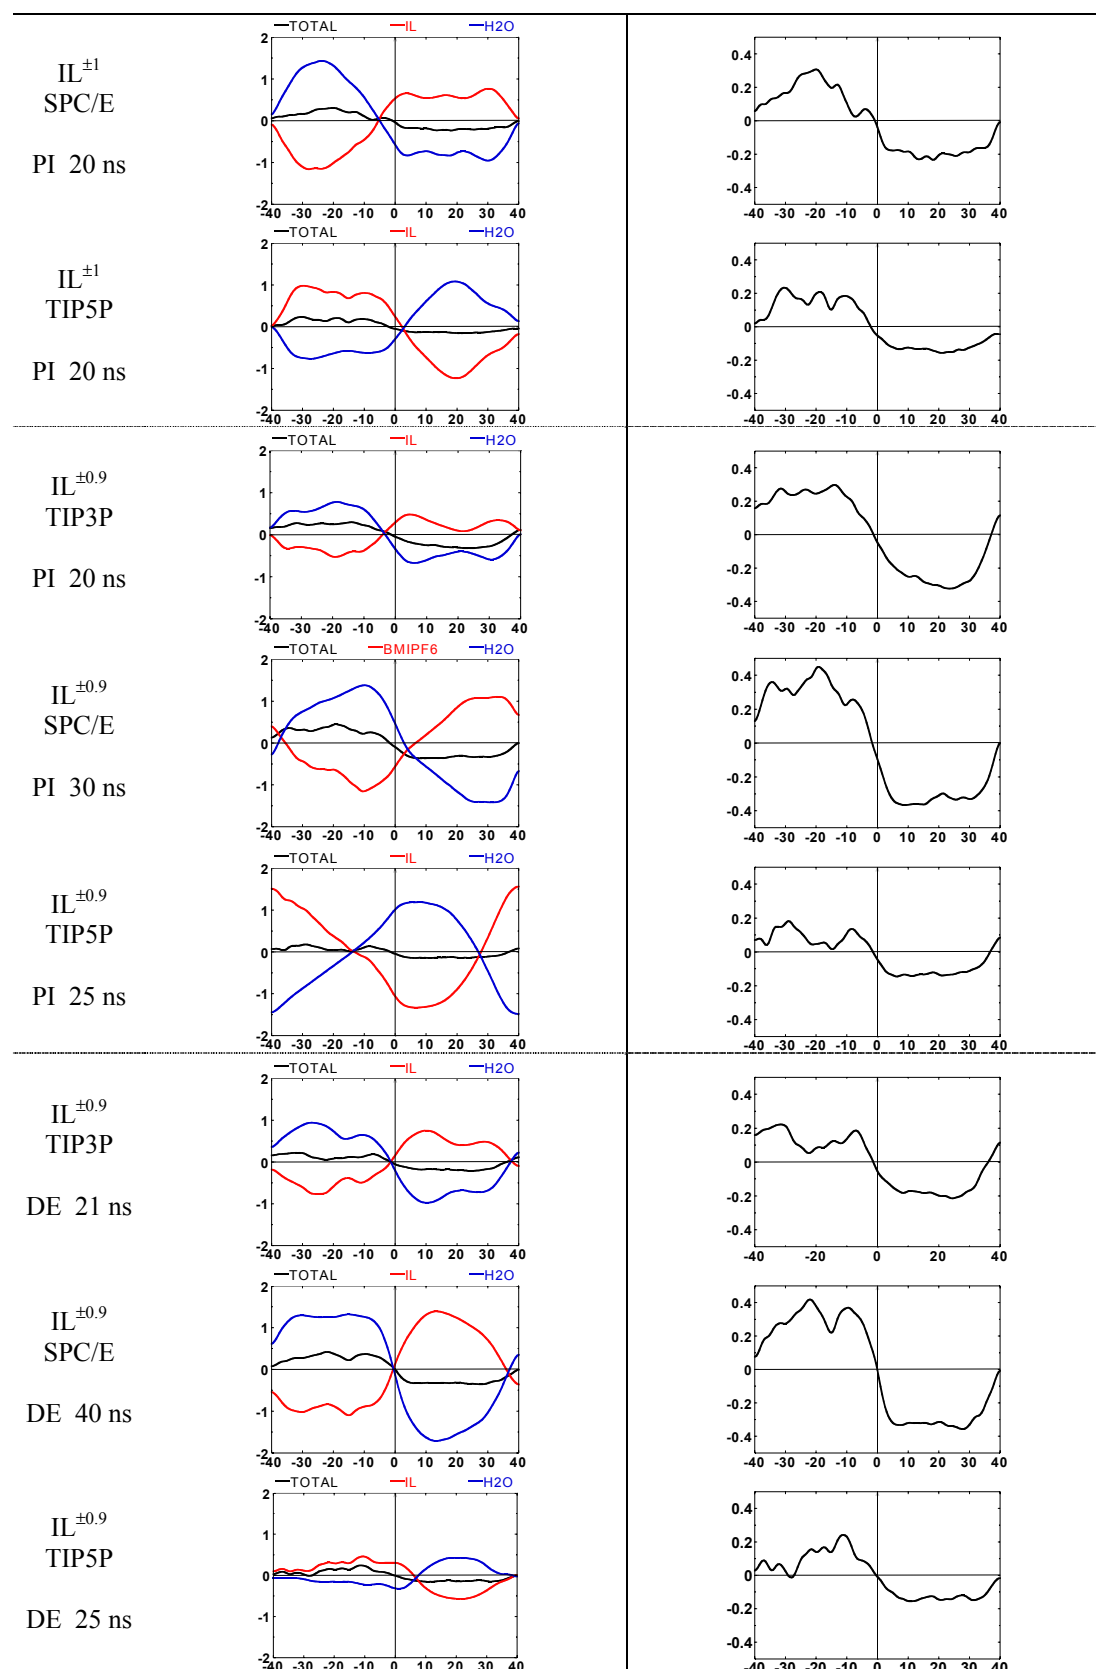

**Figure S9:** The electrostatic potential  $\phi(z)$  ("TOTAL" in black) and its components  $\phi(z)^{\text{IL}}$  (in red) +  $\phi(z)^{\text{wat}}$  (in blue) components (in volts) as a function of the z-distance from the interface. Averages over the last 1 ns of dynamics. The  $\phi(z)$  potential is also displayed separately in the right column.

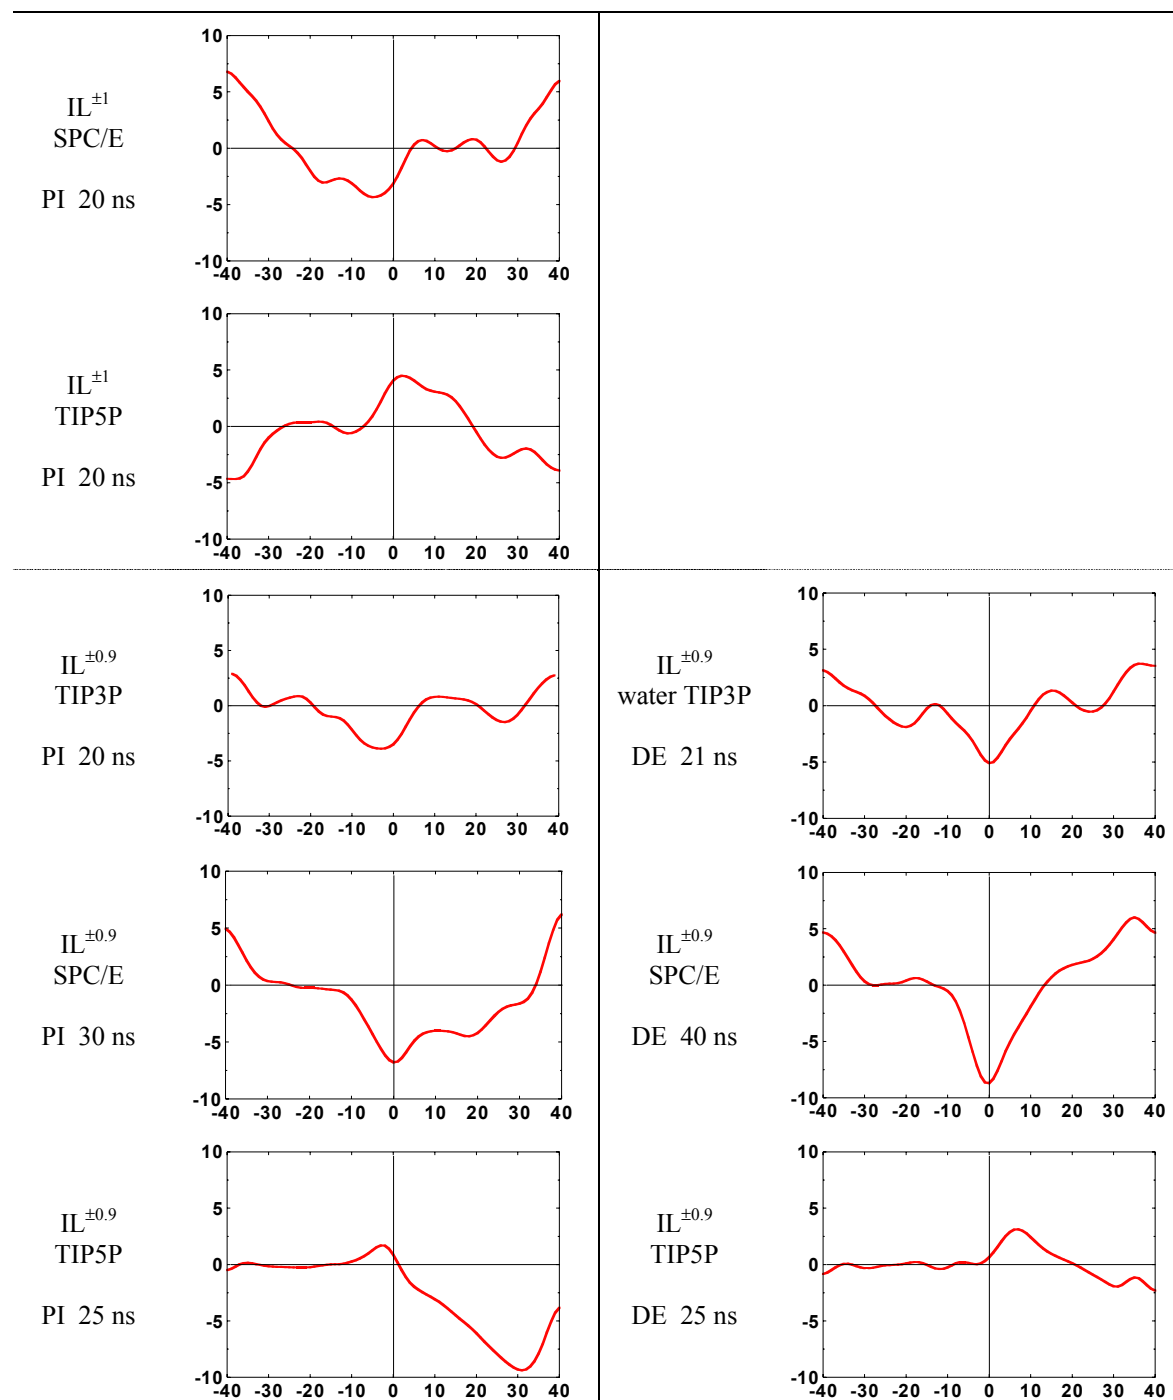

**Figure S10:** Total z-component of the H<sub>2</sub>O dipoles as a function of the distance from the interface. Average over the last ns.

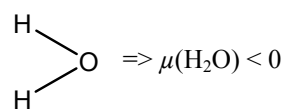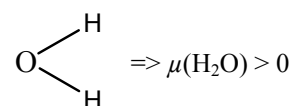

Supplement: b608218a.pdf [file b608218a.pdf]
